# Supplementary material for: Changes in Drip Irrigation Water Distribution Patterns Improve Fruit Quality and Economic Water Productivity in Early-Season Lemon Trees
Source: MDPI journal article supplement (doi:10.3390/agronomy13061519), 2023-05-31
Supplement: s1 [file s1]

Archive with 1 entries (1 files):
- agronomy-2381899-supplementary.pdf
