# Supplementary material for: Changes in Drip Irrigation Water Distribution Patterns Improve Fruit Quality and Economic Water Productivity in Early-Season Lemon Trees
Source: MDPI journal article supplement (doi:10.3390/agronomy13061519), 2023-05-31
Supplement: s1 [file s1 › agronomy-2381899-supplementary.pdf]

**Table S1.** Leaf nutrient concentrations of ‘Fino’ lemon for each irrigation system (two lines [2L] and three lines [3L]) during the experimental period (2017 and 2018).

| Irrigation system | N (%) | P (%) | K (%) | Ca (%) | Mg (%) | Na (%) | Cl (%) | Fe (ppm) | Cu (ppm) | Mn (ppm) | Zn (ppm) |
|-------------------|-------|-------|-------|--------|--------|--------|--------|----------|----------|----------|----------|
| 2017              |       |       |       |        |        |        |        |          |          |          |          |
| 2L                | 2.71  | 0.10  | 0.45  | 3.08   | 0.32   | 0.06   | 0.13   | 74       | 11       | 17       | 13       |
| 3L                | 2.79  | 0.09  | 0.48  | 3.02   | 0.31   | 0.06   | 0.10   | 80       | 11       | 15       | 11       |
| ANOVA             | ns    | ns    | ns    | ns     | ns     | ns     | ns     | ns       | ns       | ns       | ns       |
| 2018              |       |       |       |        |        |        |        |          |          |          |          |
| 2L                | 2.86  | 0.11  | 0.48  | 3.26   | 0.34a  | 0.07   | -      | 76       | 14       | 27       | 32       |
| 3L                | 2.83  | 0.10  | 0.55  | 3.23   | 0.30b  | 0.07   | -      | 81       | 12       | 23       | 33       |
| ANOVA             | ns    | ns    | ns    | ns     | *      | ns     | -      | ns       | ns       | ns       | ns       |

Values represent the average of twelve trees per irrigation system. For each column, values with different letters indicate significant differences with  $P \leq 0.05$ , using the Duncan’s test. ‘ns’, not significant; \* indicates  $P < 0.05$ .

**Table S2.** Absolute growth rate of the trunk cross-sectional area ( $AGR_{Trunk}$ ,  $cm^2 \text{ year}^{-1}$ ) and fresh pruning weigh ( $kg \text{ tree}^{-1}$ ) for each irrigation system (two lines [2L] and three lines [3L]) during the experimental period (2017 to 2019).

| $AGR_{Trunk} (cm^2 \text{ year}^{-1})$         |       |      |      |                       |
|------------------------------------------------|-------|------|------|-----------------------|
| Irrigation system                              | 2017  | 2018 | 2019 | Average 2017-2019     |
| 2L                                             | 2.3   | 2.6  | 6.1  | 2.7                   |
| 3L                                             | 2.8   | 2.6  | 6.5  | 2.7                   |
| ANOVA                                          | ns    | ns   | ns   | ns                    |
| Fresh pruning weigh ( $kg \text{ tree}^{-1}$ ) |       |      |      |                       |
| Irrigation system                              | 2017  | 2018 | 2019 | Accumulated 2017-2019 |
| 2L                                             | 20.7b | 28.7 | 27.2 | 76.7                  |
| 3L                                             | 26.0a | 30.8 | 24.4 | 81.1                  |
| ANOVA                                          | *     | ns   | ns   | ns                    |

Values represent the average of twelve trees per irrigation system. For each column, values with different letters indicate significant differences at  $P \leq 0.05$ , using the Duncan’s test. ‘ns’, not significant and \* indicates  $P < 0.05$ .
